# Supplementary material for: Hospital-Wide Intervention in Billing and Coding to Capture Complexity of Care at an Academic Referral Center
Source: PubMed Central journal article supplement — J Healthc Manag. 2022 Oct 19;67(6):416–24. doi: 10.1097/JHM-D-21-00213 (PMC9640277; doi:10.1097/jhm-d-21-00213), 2022-10-19
Supplement: jhcma-67-416-s001.pdf [file jhcma-67-416-s001.pdf]

**Supplementary Table 1. Raw Visit Data by Type**

| Level Visit    | Pre-Intervention |     |     |            |      |     |
|----------------|------------------|-----|-----|------------|------|-----|
|                | Admission        |     |     | Subsequent |      |     |
|                | 1                | 2   | 3   | 1          | 2    | 3   |
| Hospitalist 1  | 9                | 105 | 58  | 22         | 1190 | 551 |
| Hospitalist 2  | 9                | 84  | 54  | 13         | 905  | 523 |
| Hospitalist 3  | 3                | 19  | 24  | 1          | 496  | 323 |
| Hospitalist 4  | 14               | 54  | 7   | 19         | 466  | 193 |
| Hospitalist 5  | 4                | 64  | 34  | 4          | 856  | 435 |
| Hospitalist 6  | 11               | 64  | 54  | 14         | 1046 | 534 |
| Hospitalist 7  | 10               | 58  | 24  | 31         | 1146 | 554 |
| Hospitalist 8  | 19               | 35  | 23  | 0          | 1    | 0   |
| Hospitalist 9  | 10               | 95  | 69  | 5          | 965  | 577 |
| Hospitalist 10 | 9                | 26  | 26  | 7          | 238  | 157 |
| Hospitalist 11 | 3                | 11  | 21  | 14         | 164  | 94  |
| Hospitalist 12 | 9                | 43  | 16  | 9          | 614  | 246 |
| Hospitalist 13 | 7                | 189 | 319 | 2          | 104  | 91  |
| Hospitalist 14 | 5                | 13  | 9   | 4          | 254  | 146 |
| Hospitalist 15 | 13               | 71  | 43  | 17         | 1108 | 458 |
| Hospitalist 16 | 5                | 53  | 34  | 12         | 1058 | 466 |
| Hospitalist 17 | 4                | 35  | 22  | 4          | 251  | 119 |
| Hospitalist 18 | 2                | 30  | 25  | 1          | 282  | 167 |
| Hospitalist 19 | 2                | 30  | 25  | 6          | 923  | 500 |
| Hospitalist 20 | 1                | 8   | 4   | 3          | 118  | 51  |
| Hospitalist 21 | 4                | 36  | 20  | 11         | 214  | 149 |
| Hospitalist 22 | 3                | 50  | 35  | 4          | 946  | 431 |
| Hospitalist 23 | 5                | 62  | 27  | 1          | 256  | 202 |
| Hospitalist 24 | 16               | 38  | 35  | 9          | 1075 | 511 |
| Hospitalist 25 | 10               | 229 | 151 | 0          | 1    | 1   |
| Hospitalist 26 | 22               | 156 | 195 | 0          | 4    | 8   |

|               | Post - Intervention |    |     |            |     |      |
|---------------|---------------------|----|-----|------------|-----|------|
|               | Admission           |    |     | Subsequent |     |      |
|               | 1                   | 2  | 3   | 1          | 2   | 3    |
| Hospitalist 1 | 5                   | 41 | 133 | 3          | 379 | 1286 |
| Hospitalist 2 | 1                   | 34 | 84  | 1          | 337 | 916  |
| Hospitalist 3 | 3                   | 35 | 167 | 3          | 371 | 823  |
| Hospitalist 4 | 15                  | 90 | 31  | 9          | 293 | 791  |
| Hospitalist 5 | 1                   | 2  | 47  | 2          | 186 | 593  |
| Hospitalist 6 | 9                   | 36 | 78  | 7          | 538 | 939  |
| Hospitalist 7 | 12                  | 56 | 86  | 20         | 372 | 690  |
| Hospitalist 8 | 4                   | 11 | 216 | 0          | 1   | 3    |
| Hospitalist 9 | 11                  | 48 | 108 | 9          | 538 | 1364 |

|                |    |    |     |    |     |      |
|----------------|----|----|-----|----|-----|------|
| Hospitalist 10 | 6  | 57 | 141 | 7  | 452 | 989  |
| Hospitalist 11 | 7  | 77 | 171 | 12 | 503 | 922  |
| Hospitalist 12 | 3  | 6  | 31  | 0  | 120 | 343  |
| Hospitalist 13 | 6  | 42 | 427 | 42 | 405 | 711  |
| Hospitalist 14 | 10 | 68 | 130 | 4  | 411 | 1152 |
| Hospitalist 15 | 7  | 29 | 112 | 6  | 450 | 964  |
| Hospitalist 16 | 0  | 40 | 99  | 13 | 437 | 1007 |
| Hospitalist 17 | 3  | 31 | 120 | 1  | 328 | 744  |
| Hospitalist 18 | 4  | 14 | 132 | 0  | 295 | 1096 |
| Hospitalist 19 | 13 | 48 | 83  | 12 | 407 | 1009 |
| Hospitalist 20 | 7  | 34 | 121 | 2  | 259 | 500  |
| Hospitalist 21 | 1  | 15 | 92  | 1  | 353 | 1156 |
| Hospitalist 22 | 1  | 32 | 91  | 1  | 258 | 612  |
| Hospitalist 23 | 7  | 53 | 127 | 11 | 511 | 1058 |
| Hospitalist 24 | 8  | 56 | 178 | 5  | 266 | 872  |
| Hospitalist 25 | 2  | 51 | 183 | 0  | 3   | 8    |
| Hospitalist 26 | 4  | 91 | 331 | 2  | 3   | 5    |
